# Supplementary material
Source: publisher figshare collection journal article supplement (https://acs.figshare.com/ndownloader/files/4976039)
Supplement: Supplementary file 1 [file 4976039]

Compound	SMILES
1	CN(C)C(C=C1)=CC=C1C2NC3=CC(OC)=CC=C3N4C2=CC=C4
2a	NC1=C([N+]([O-])=O)C=C(OC)C=C1
2b	NC1=C([N+]([O-])=O)C=C(O)C=C1
2c	NC1=C([N+]([O-])=O)C=C(F)C=C1
2d	NC1=C([N+]([O-])=O)C=C(F)C(F)=C1
3	COC1OC(OC)CC1
4a	O=[N+]([O-])C1=C(N2C=CC=C2)C=CC(OC)=C1
4b	OC1=CC([N+]([O-])=O)=C(N2C=CC=C2)C=C1
4c	FC1=CC([N+]([O-])=O)=C(N2C=CC=C2)C=C1
4d	FC1=CC([N+]([O-])=O)=C(N2C=CC=C2)C=C1F
5a	NC1=C(N2C=CC=C2)C=CC(OC)=C1
5b	NC1=C(N2C=CC=C2)C=CC(O)=C1
5c	NC1=C(N2C=CC=C2)C=CC(F)=C1
5d	NC1=C(N2C=CC=C2)C=C(F)C(F)=C1
5e	NC1=C(N2C=CC=C2)C=CC=C1
6a	CN(C)C1=CC=C(C=O)C=C1
6b	O=CC1=CC([N+]([O-])=O)=CC=C1
6c	OC1=CC=C(C=O)C=C1
6d	O=CC1=CC=C(OC(F)(F)F)C=C1
6e	O=CC1=CC=C([N+]([O-])=O)C=C1
6f	CCN(CC)C1=CC=C(C=O)C=C1
6g	O=CC1=CC=C(N2CCCC2)C=C1
6h	O=CC1=CC=C(N2CCOCC2)C=C1
7	CN(C)C(C=C1)=CC=C1C2NC3=CC(OC)=CC=C3N4C2=CC=C4
8	CN(C)C(C=C1)=CC=C1C2=NC3=CC(OC)=CC=C3N4C2=CC=C4
9a	CN(C)C(C=C1)=CC=C1C2=NC3=CC=CC=C3N4C2=CC=C4
9b	O=[N+]([O-])C1=CC(C2=NC3=CC=CC=C3N4C2=CC=C4)=CC=C1
9c	NC1=CC(C2=NC3=CC=CC=C3N4C2=CC=C4)=CC=C1
9d	OC(C=C1)=CC=C1C2=NC3=CC=CC=C3N4C2=CC=C4
9e	FC(F)(F)OC(C=C1)=CC=C1C2=NC3=CC=CC=C3N4C2=CC=C4
9f	O=[N+]([O-])C(C=C1)=CC=C1C2=NC3=CC=CC=C3N4C2=CC=C4
9g	NC(C=C1)=CC=C1C2=NC3=CC=CC=C3N4C2=CC=C4
9h	CCNC(C=C1)=CC=C1C2=NC3=CC=CC=C3N4C2=CC=C4
9i	C1(N=C2C3=CC=C(N4CCCC4)C=C3)=CC=CC=C1N5C2=CC=C5
9j	C1(N=C2C3=CC=C(N4CCOCC4)C=C3)=CC=CC=C1N5C2=CC=C5
10a	O=CC1=CN=CC=C1
10b	O=CC1=CC=NC=C1
10c	O=CC1=CCCCC1
10d	O=CC1=CC=CC2=C1C=CC=C2
11a	C1(N=C2C3=CC=CN=C3)=CC=CC=C1N4C2=CC=C4
11b	C1(N=C2C3=CC=NC=C3)=CC=CC=C1N4C2=CC=C4
11c	C1(N=C2C3=CCCCC3)=CC=CC=C1N4C2=CC=C4
11d	C1(N=C2C3=CC=CC4=C3C=CC=C4)=CC=CC=C1N5C2=CC=C5
12a	COC1=CC=C2C(N=C(C3=CC=C(O)C=C3)C4=CC=CN42)=C1
12b	COC1=CC=C2C(N=C(C3=CC=C([N+]([O-])=O)C=C3)C4=CC=CN42)=C1
12c	COC1=CC=C2C(N=C(C3=CC=C(N)C=C3)C4=CC=CN42)=C1
12d	OC1=CC=C2C(N=C(C3=CC=C(O)C=C3)C4=CC=CN42)=C1
12e	OC1=CC=C2C(N=C(C3=CC=C([N+]([O-])=O)C=C3)C4=CC=CN42)=C1
12f	OC1=CC=C2C(N=C(C3=CC=C(N)C=C3)C4=CC=CN42)=C1
12g	OC1=CC=C2C(N=C(C3=CC=C(N(C)C)C=C3)C4=CC=CN42)=C1
12h	FC1=CC=C2C(N=C(C3=CC=C([N+]([O-])=O)C=C3)C4=CC=CN42)=C1
12i	FC1=CC=C2C(N=C(C3=CC=C(N)C=C3)C4=CC=CN42)=C1
12j	FC1=CC=C2C(N=C(C3=CC=C(N(C)C)C=C3)C4=CC=CN42)=C1
12k	FC1=C(F)C=C2C(N=C(C3=CC=C([N+]([O-])=O)C=C3)C4=CC=CN42)=C1
12l	FC1=C(F)C=C2C(N=C(C3=CC=C(N)C=C3)C4=CC=CN42)=C1
12m	FC1=C(F)C=C2C(N=C(C3=CC=C(N(C)C)C=C3)C4=CC=CN42)=C1
13a	COC1=CC=C2C(N=C(C3=CC=CN=C3)C4=CC=CN42)=C1
13b	OC1=CC=C2C(N=C(C3=CC=CN=C3)C4=CC=CN42)=C1
14a	C=CCOC1=CC=C2C(N=C(C3=CC=C([N+]([O-])=O)C=C3)C4=CC=CN42)=C1
14b	FCCOC1=CC=C2C(N=C(C3=CC=C([N+]([O-])=O)C=C3)C4=CC=CN42)=C1
15a	NC(C=C1)=CC=C1C2=NC3=CC(OCCC)=CC=C3N4C2=CC=C4
15b	NC(C=C1)=CC=C1C2=NC3=CC(OCCF)=CC=C3N4C2=CC=C4
16	CN(C)C(C=C1)=CC=C1C2=NC3=CC(OC(C)(C)C(N)=O)=CC=C3N4C2=CC=C4
